# Supplementary material
Source: Research Square preprint supplement (doi:10.21203/rs.3.rs-8666786/v1)
Supplement: Supplementary file 1 [file d885404faaa967f51f93bd2a.docx]

**Table S1 – Bacterial Metabolites**

| R.Time | I.Time | Height | A/H | Mark | Name |
| --- | --- | --- | --- | --- | --- |
| 3 | 3.509 | 0.06 | 0.08 | 3.01 | Butyric acid |
| 8 | 3.851 | 0.04 | 0.05 | 3.73 | Salicylic acid |
| 9 | 3.908 | 0.02 | 0.04 | 2.39 | Cyclobutaneoctol |
| 13 | 4.248 | 0.02 | 0.03 | 2.13 | 2,3-Butanediol |
| 15 | 4.359 | 0.04 | 0.04 | 3.73 | Propanedioic acid |
| 16 | 4.445 | 0.01 | 0.03 | 1.81 | Oleic acid |
| 17 | 4.497 | 0.01 | 0.03 | 1.51 | **Ascorbate** |
| 18 | 4.555 | 0.02 | 0.03 | 2.68 | Butanal |
| 22 | 4.850 | 0.04 | 0.06 | 2.37 | oxaloacetate |
| 23 | 4.902 | 0.04 | 0.04 | 3.44 | Benzyl alcohol |
| 24 | 4.980 | 0.06 | 0.08 | 3.30 | Carbonic acid |
| 26 | 5.170 | 0.10 | 0.08 | 5.42 | Proline |
| 29 | 5.463 | 0.03 | 0.02 | 4.49 | Propenoic acid |
| 31 | 5.711 | 0.02 | 0.03 | 2.28 | Nitric oxide |
| 32 | 5.798 | 0.04 | 0.06 | 2.73 | Acetamide |
| 33 | 5.857 | 0.04 | 0.05 | 3.13 | 1-Octadecanamine, |
| 38 | 6.296 | 0.11 | 0.06 | 7.73 | 2-Butenedioic acid, |
| 39 | 6.360 | 0.03 | 0.05 | 2.69 | Dihydroxymaleic acid |
| 42 | 6.610 | 0.02 | 0.04 | 2.08 | Acetic acid |
| 43 | 6.660 | 0.01 | 0.02 | 2.40 | Acetonitrile, |
| 44 | 6.717 | 0.01 | 0.02 | 1.84 | Butanoic acid |
| 46 | 6.826 | 0.02 | 0.04 | 2.36 | Citrate |
| 47 | 6.897 | 0.03 | 0.04 | 2.71 | Ethanol, |
| 60 | 7.884 | 0.05 | 0.05 | 3.85 | Butanal, |
| 61 | 7.968 | 0.05 | 0.06 | 3.47 | Glycidol |
| 62 | 8.030 | 0.04 | 0.06 | 2.54 | 2-Aminononadecane |
| 63 | 8.088 | 0.05 | 0.06 | 3.61 | 2-(1,1-Dimethylethyl)-5-oxohexanal |
| 67 | 8.380 | 0.03 | 0.05 | 2.06 | Propanedioic acid |
| 70 | 8.633 | 0.06 | 0.08 | 2.98 | Allantoic acid |
| 71 | 8.685 | 0.03 | 0.06 | 2.02 | Butanal, |
| 72 | 8.748 | 0.07 | 0.08 | 3.12 | Nitrate |
| 75 | 9.042 | 0.03 | 0.03 | 3.82 | Acetic acid |
| 76 | 9.106 | 0.01 | 0.03 | 1.67 | Ethanamine, |
| 80 | 9.428 | 0.03 | 0.06 | 2.10 | Hydroxyurea |
| 83 | 9.657 | 0.02 | 0.04 | 2.02 | Acetic acid |
| 90 | 10.208 | 0.04 | 0.04 | 3.77 | 1-Butanamine, |
| 94 | 10.485 | 0.03 | 0.03 | 3.99 | Carbonic acid |
| 95 | 10.586 | 0.04 | 0.04 | 4.12 | Pentanal, |
| 96 | 10.629 | 0.03 | 0.05 | 2.83 | 2-Nonanone |
| 97 | 10.696 | 0.04 | 0.07 | 2.42 | Butanal, |
| 105 | 11.513 | 0.11 | 0.08 | 5.30 | Benzaldehyde, |
| 107 | 11.677 | 0.13 | 0.08 | 6.44 | Malic acid |
| 112 | 12.230 | 0.10 | 0.08 | 4.77 | Alanine |
| 116 | 12.453 | 0.04 | 0.05 | 2.95 | 1-Butanol, |
| 119 | 12.660 | 0.08 | 0.06 | 5.41 | Glycidol |
| 122 | 12.857 | 0.07 | 0.06 | 5.36 | Butanal, |
| 125 | 13.107 | 0.05 | 0.05 | 3.95 | Acetamide, |
| 127 | 13.244 | 0.02 | 0.04 | 2.25 | Isoxazolidine, |
| 130 | 13.483 | 0.04 | 0.07 | 2.53 | Formic acid |
| 131 | 13.530 | 0.04 | 0.07 | 2.07 | Pyrimidine-2,4(1H,3H)-dione, |
| 133 | 13.671 | 0.16 | 0.09 | 6.88 | Butanal, |
| 135 | 13.857 | 0.08 | 0.08 | 4.37 | Glycidol |
| 158 | 15.587 | 0.14 | 0.09 | 6.17 | 2-Methylamino-N-phenyl-acetamide |
| 159 | 15.702 | 0.07 | 0.07 | 4.10 | Butane, |
| 161 | 15.952 | 0.14 | 0.12 | 4.84 | Butanal, |
| 189 | 17.955 | 0.03 | 0.05 | 2.42 | Acetic acid |
| 193 | 18.305 | 0.06 | 0.07 | 3.47 | 2-Propanamine |
| 195 | 18.448 | 0.06 | 0.08 | 3.12 | Asparagine |
| 196 | 18.490 | 0.04 | 0.08 | 2.09 | Acetaldehyde |
| 199 | 18.726 | 0.07 | 0.07 | 3.95 | Acetamide, |
| 203 | 19.030 | 0.06 | 0.08 | 3.17 | Acetoin |
| 207 | 19.373 | 0.06 | 0.07 | 3.11 | Furanone, |
| 209 | 19.563 | 0.08 | 0.08 | 3.97 | D-Alanine |
| 210 | 19.618 | 0.06 | 0.08 | 3.19 | Glycidol |
| 219 | 20.411 | 0.10 | 0.07 | 5.85 | Isobutane |
| 222 | 20.697 | 0.07 | 0.09 | 3.23 | Butane, |
| 225 | 20.900 | 0.06 | 0.09 | 2.65 | Propanamide, |
| 227 | 21.046 | 0.08 | 0.10 | 3.26 | Ether, |
| 228 | 21.090 | 0.05 | 0.09 | 2.33 | 3-Butenamide |
| **235** | **21.762** | **0.03** | **0.03** | **3.77** | **Histidine,** |
| 253 | 23.123 | 0.04 | 0.05 | 3.77 | Propanoic acid |
| 254 | 23.180 | 0.05 | 0.06 | 3.21 | Cyclobutanol |
| 257 | 23.461 | 0.03 | 0.05 | 2.49 | 1,2-Hydrazinedicarboxamide |
| 258 | 23.508 | 0.08 | 0.07 | 4.74 | 1,2-Oxathiolane, |
| 259 | 23.630 | 0.08 | 0.08 | 4.29 | Butanal |
| 260 | 23.690 | 0.05 | 0.08 | 2.70 | Oxalacetic acid |
| 261 | 23.733 | 0.06 | 0.09 | 2.58 | Dihydroxymaleic acid |
| 266 | 24.045 | 0.06 | 0.08 | 3.00 | Cyclopropy carbinol |
| 275 | 24.695 | 0.04 | 0.08 | 2.15 | 2-Propanamine |
| 276 | 24.732 | 0.05 | 0.09 | 2.25 | Butanal, |
| 280 | 25.045 | 0.03 | 0.04 | 2.42 | 10-Undecenoic acid |
| 284 | 25.467 | 1.12 | 0.50 | 9.13 | ethanol, |
| 288 | 25.950 | 0.11 | 0.20 | 2.24 | acetamide, |
| 295 | 26.459 | 0.10 | 0.14 | 2.77 | Pyridine-3-carbonitrile, |
| 296 | 26.510 | 0.12 | 0.15 | 3.29 | Oxaloacetic acid |
| 309 | 27.437 | 0.04 | 0.06 | 2.63 | Acetoxyacetic acid |
| 312 | 27.740 | 0.08 | 0.07 | 4.70 | Urea, |
| 313 | 27.833 | 0.09 | 0.10 | 3.84 | 1-Propanone, acid |
| 314 | 27.890 | 0.02 | 0.05 | 1.97 | Phthalic acid |
| 321 | 28.489 | 0.04 | 0.06 | 2.72 | Ethanamine, |
| 322 | 28.585 | 0.07 | 0.07 | 3.82 | Acetamide, |
| 327 | 28.971 | 0.05 | 0.07 | 3.11 | Cycloserine |
| 328 | 29.040 | 0.06 | 0.06 | 4.47 | Acetamide, |
| 329 | 29.243 | 0.17 | 0.08 | 8.42 | Benzeneethanamine, |
| 333 | 29.609 | 0.11 | 0.07 | 6.31 | Ethyl oxamate |
| 337 | 30.121 | 0.06 | 0.06 | 4.11 | 2,4(1H,3H)-Pyrimidinedione, |
| 341 | 30.447 | 0.04 | 0.04 | 3.77 | Guanidine carbonate |
| 342 | 30.517 | 0.04 | 0.05 | 3.44 | Glycidol |
| 343 | 30.568 | 0.03 | 0.04 | 3.16 | Tartronic acid |
| 345 | 30.756 | 0.03 | 0.04 | 2.83 | Pyridine-3-carbonitrile, |
| 346 | 30.809 | 0.03 | 0.06 | 2.35 | Acetamide, |
| 351 | 31.126 | 0.09 | 0.08 | 5.05 | Butanal, |
| 352 | 31.221 | 0.09 | 0.07 | 4.97 | Butanoic acid |
| 353 | 31.281 | 0.05 | 0.06 | 3.01 | 1,3-Propanediamine, |
| 354 | 31.429 | 0.07 | 0.05 | 5.59 | Pentanal |
| 355 | 31.499 | 0.06 | 0.05 | 5.17 | Phosphorothioic acid |
| 361 | 32.004 | 0.03 | 0.04 | 2.50 | 1-Octadecanamine, |
| 362 | 32.067 | 0.05 | 0.04 | 4.58 | Propanamide |
| 367 | 32.454 | 0.04 | 0.03 | 4.54 | Ethanol, |
| 368 | 32.562 | 0.02 | 0.04 | 1.82 | Nitroguanidine |
| 370 | 32.688 | 0.02 | 0.03 | 3.00 | Butanal, |
| 371 | 32.741 | 0.03 | 0.05 | 2.09 | 1,6-Dideoxygalactitol |
| 372 | 32.803 | 0.05 | 0.05 | 4.39 | Phenethylamine, |
| 374 | 32.962 | 0.06 | 0.06 | 3.55 | Butanal, |
| 393 | 34.272 | 0.07 | 0.09 | 3.20 | Acetaldehyde |
| 397 | 34.569 | 0.08 | 0.09 | 3.89 | Pentanal |
| 398 | 34.731 | 0.08 | 0.05 | 5.80 | Tartronic acid |
| 399 | 34.773 | 0.11 | 0.07 | 6.71 | Acetaldehyde |
| 402 | 35.044 | 0.14 | 0.08 | 7.23 | Propanamide, |
| 403 | 35.154 | 0.09 | 0.09 | 4.30 | cis-3-Hexenyllactate |
| 408 | 35.636 | 0.18 | 0.09 | 8.06 | Acetamide, |
| 409 | 35.788 | 0.07 | 0.08 | 3.71 | Hydroxyurea |
| 412 | 35.919 | 0.03 | 0.06 | 2.36 | 1,2-Benzenediol, |
| 415 | 36.116 | 0.03 | 0.06 | 2.21 | Succindialdehyde |
| 417 | 36.255 | 0.05 | 0.06 | 3.64 | Ethanol, |
| 421 | 36.566 | 0.15 | 0.09 | 6.88 | Acetamide |
| 424 | 36.769 | 0.05 | 0.09 | 2.27 | Alanine, |
| 425 | 36.814 | 0.09 | 0.09 | 3.99 | Pentanal, |
| 427 | 37.021 | 0.11 | 0.11 | 4.14 | 3-Furancarboxylic acid |
| 428 | 37.057 | 0.05 | 0.10 | 2.21 | Cathinone |
| 432 | 37.460 | 0.11 | 0.08 | 5.44 | Carbonic acid |
| 433 | 37.536 | 0.07 | 0.09 | 3.10 | Cycloserine |
| 441 | 38.274 | 0.05 | 0.07 | 3.12 | Pentanal |
| 442 | 38.309 | 0.07 | 0.08 | 3.73 | Acetamide, |
| 444 | 38.442 | 0.03 | 0.06 | 2.19 | 2,4-Pentanediamine, |
| 453 | 39.147 | 0.07 | 0.07 | 3.81 | Acetamide, |
| 455 | 39.314 | 0.08 | 0.09 | 3.69 | Butanal, |
| 456 | 39.359 | 0.10 | 0.10 | 4.39 | Acetic acid |
| 457 | 39.446 | 0.07 | 0.07 | 3.91 | Propionic acid |
| 458 | 39.548 | 0.09 | 0.08 | 4.58 | Hydrastininic acid |
| 470 | 40.389 | 0.06 | 0.08 | 2.66 | 1,6-Dideoxygalactitol |
| 471 | 40.512 | 0.19 | 0.11 | 7.45 | 1,3-Dioxolane, |
| 472 | 40.607 | 0.05 | 0.07 | 3.28 | Thiophene-3-ol, |
| 473 | 40.669 | 0.06 | 0.08 | 3.35 | 1,2-Ethanediol, |
| 474 | 40.730 | 0.06 | 0.06 | 3.85 | Ethylene oxide |
| 478 | 41.040 | 0.04 | 0.05 | 3.85 | 1,3-Bis(hydroxymethyl)urea |
| 479 | 41.109 | 0.02 | 0.04 | 1.91 | Ethanamine, |
| 483 | 41.420 | 0.03 | 0.05 | 2.59 | Benzeneethanamine, |
| 484 | 41.490 | 0.02 | 0.03 | 2.58 | dl-3-Aminoisobutyric acid |
| 485 | 41.623 | 0.09 | 0.06 | 5.58 | Epinephrine |
| 486 | 41.668 | 0.10 | 0.07 | 5.88 | 2,4(1H,3H)-Pyrimidinedione, |
| 487 | 41.783 | 0.04 | 0.05 | 3.39 | Glycidol |
| 489 | 41.983 | 0.04 | 0.06 | 2.86 | Acetamide, |
| 490 | 42.020 | 0.03 | 0.06 | 2.24 | Ethyl |
| 494 | 42.247 | 0.04 | 0.06 | 2.78 | Butanal, |
| 495 | 42.311 | 0.03 | 0.05 | 2.89 | Acetaldehyde |
| 497 | 42.444 | 0.05 | 0.07 | 2.89 | 2,4(1H,3H)-Pyrimidinedione, |
| 498 | 42.564 | 0.12 | 0.08 | 6.18 | Ethyl |
| 503 | 42.918 | 0.04 | 0.06 | 2.47 | Glycidol |
| 506 | 43.182 | 0.12 | 0.08 | 6.47 | Acetic acid |
| 508 | 43.405 | 0.03 | 0.04 | 2.86 | Cyclobutanol |
| 510 | 43.566 | 0.03 | 0.03 | 4.93 | Oxalacetic acid |
| 511 | 43.618 | 0.01 | 0.02 | 1.73 | 1h-Pyrrole-3,4-diacetic acid |
| 515 | 43.857 | 0.04 | 0.06 | 2.72 | Butanal, |
| 517 | 43.986 | 0.06 | 0.06 | 3.94 | L-Alanine |
| 526 | 44.961 | 0.18 | 0.20 | 3.63 | Octadecanoic acid |
| 528 | 45.092 | 0.05 | 0.09 | 2.29 | Creatine |
| 534 | 45.460 | 0.14 | 0.11 | 5.34 | L-Alanine-4-nitroanilide |
| **537** | **45.736** | **0.09** | **0.08** | **4.55** | **Butanal,** |
| 539 | 45.850 | 0.07 | 0.08 | 3.39 | 2-Butanamine, |
| 540 | 45.900 | 0.03 | 0.06 | 1.96 | 2,4(1H,3H)-Pyrimidinedione, |
| 541 | 45.960 | 0.04 | 0.06 | 2.43 | 1,2-Ethanediamine, |
| 542 | 46.030 | 0.05 | 0.06 | 3.64 | Benzoic acid |
| 543 | 46.084 | 0.04 | 0.04 | 3.42 | 1-Propanamine, |
| 546 | 46.336 | 0.03 | 0.05 | 2.27 | Urea, |
| 548 | 46.454 | 0.12 | 0.09 | 5.50 | 1-Octadecanamine, |
| 551 | 46.797 | 0.03 | 0.05 | 2.47 | 1,2-Ethanediamine, |
| 552 | 46.848 | 0.05 | 0.05 | 4.51 | Urea, |
| 559 | 47.344 | 0.05 | 0.05 | 3.98 | Silicic acid |
| 560 | 47.432 | 0.07 | 0.08 | 3.26 | Propanamide, |
| 565 | 47.836 | 0.07 | 0.07 | 3.87 | Uridine, |
| 573 | 48.472 | 0.04 | 0.06 | 2.99 | Propanoic acid |
| 575 | 48.594 | 0.05 | 0.07 | 2.98 | Acetic acid |
| 610 | 51.102 | 0.17 | 0.30 | 2.28 | Hydrastininic acid |
| 614 | 51.304 | 0.37 | 0.32 | 4.70 | Isophthalic acid |
| 616 | 51.482 | 0.20 | 0.35 | 2.33 | Ribofuranoside, |
| 620 | 51.722 | 0.57 | 0.38 | 6.10 | Cycloserine |
| 626 | 52.158 | 0.86 | 0.44 | 7.99 | Thymol, |
| 627 | 52.240 | 0.38 | 0.44 | 3.50 | Hydrastininic acid |
| 630 | 52.430 | 0.33 | 0.46 | 2.96 | Benzoic acid |
| 632 | 52.554 | 0.41 | 0.47 | 3.49 | Thymol, |
