# Supplementary material
Source: Research Square preprint supplement (doi:10.21203/rs.3.rs-8666786/v1)
Supplement: Supplementary file 2 [file f8c13112c77200e287d1e689.docx]

Under cadmium stress (Fresh weight (g))

Experimental group

| Cadmium concentrations | Replicate 1 | Replicate 2 | Replicate 3 |
| --- | --- | --- | --- |
| 0 mM cd | 4.5 | 3.8 | 4.0 |
| 50 mM cd | 4.0 | 3.7 | 4.1 |
| 75 mM cd | 3.3 | 3.0 | 3.3 |
| 100 mM cd | 2.8 | 2.5 | 2.3 |

control group

| Cadmium concentrations | Replicate 1 | Replicate 2 | Replicate 3 |
| --- | --- | --- | --- |
| 0 mM cd | 3.5 | 3.67 | 3.3 |
| 50 mM cd | 3.1 | 3.0 | 3.4 |
| 75 mM cd | 2.2 | 2.4 | 2.5 |
| 100 mM cd | 0.92 | 1.0 | 1.3 |

Under cadmium stress (Dry weight (g))

Experimental group

| Cadmium concentrations | Replicate 1 | Replicate 2 | Replicate 3 |
| --- | --- | --- | --- |
| 0 mM cd | 0.52 | 0.46 | 0.48 |
| 50 mM cd | 0.46 | 0.43 | 0.48 |
| 75 mM cd | 0.38 | 0.35 | 0.38 |
| 100 mM cd | 0.32 | 0.30 | 0.27 |

Control group

| Cadmium concentrations | Replicate 1 | Replicate 2 | Replicate 3 |
| --- | --- | --- | --- |
| 0 mM cd | 0.42 | 0.44 | 0.39 |
| 50 mM cd | 0.37 | 0.36 | 0.41 |
| 75 mM cd | 0.26 | 0.29 | 0.30 |
| 100 mM cd | 0.12 | 0.17 | 0.14 |

**UNDER NORMAL CONDITIONS**

**(fresh weight (g)**

|  | experimental Group | Control group |
| --- | --- | --- |
| Replicate 1 | 18.05 | 11.8 |
| Replicate2 | 18.03 | 12 |
| Replicate3 | 17.9 | 11.67 |

Dry Weight (g)

|  | experimental Group | Control group |
| --- | --- | --- |
| Replicate 1 | 4.6 | 2.2 |
| Replicate2 | 4.7 | 2.5 |
| Replicate3 | 4.56 | 2.0 |
